# Supplementary material for: What does carbon tolerant really mean?Operandovibrational studies of carbon accumulation on novel solid oxide fuel cell anodes prepared by infiltration
Source: Royal Society of Chemistry journal article supplement (doi:10.1039/d0cp00195c), 2020-01-01
Supplement: d0cp00195c1.pdf [file d0cp00195c1.pdf]

## Supplementary Information

### What Does Carbon Tolerant Really Mean?

#### ***Operando* Vibrational Studies of Carbon Accumulation on Novel Solid Oxide Fuel Cell Anodes Prepared by Infiltration**

Martha M. Welander<sup>†a</sup>, Daniel B. Drasbæk<sup>†b</sup>, Marie L. Traulsen<sup>b</sup>, Bhaskar R. Sudireddy<sup>b</sup>, Peter Holtappels<sup>b</sup>, Robert A. Walker<sup>a,c</sup>

---

<sup>a</sup> Department of Chemistry & Biochemistry, Montana State University, P.O. Box, 173400 Bozeman MT 59715

<sup>b</sup> Department of Energy Conversion and Storage, Technical University of Denmark, Building 310, Fysikvej 1, 2800 Kgs. Lyngby, Denmark

<sup>c</sup> Montana Materials Science Program, Montana State University, P.O. Box, 173400 Bozeman MT 59715

<sup>†</sup> Both authors contributed equally to this study

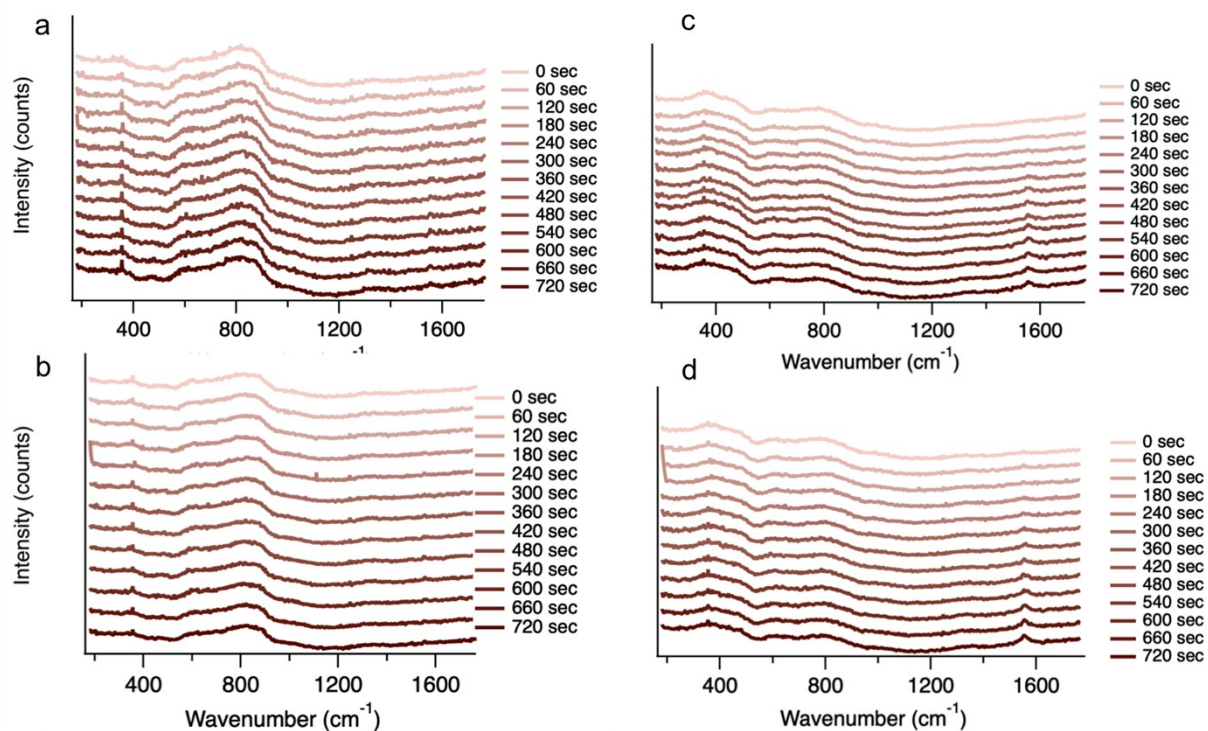

SI-1. Raman spectra of G-band growth corresponding to high current density kinetics shown in Figure 3 for (a) Co-CGO, (b) NiCGO, (c) NiCoCGO, (d) Ni infiltrates.
